# Supplementary material for: Nanos Is Expressed in Somatic and Germline Tissue during Larval and Post-Larval Development of the Annelid Alitta virens
Source: MDPI journal article supplement (doi:10.3390/genes13020270), 2022-01-29
Supplement: s1 [file s1]

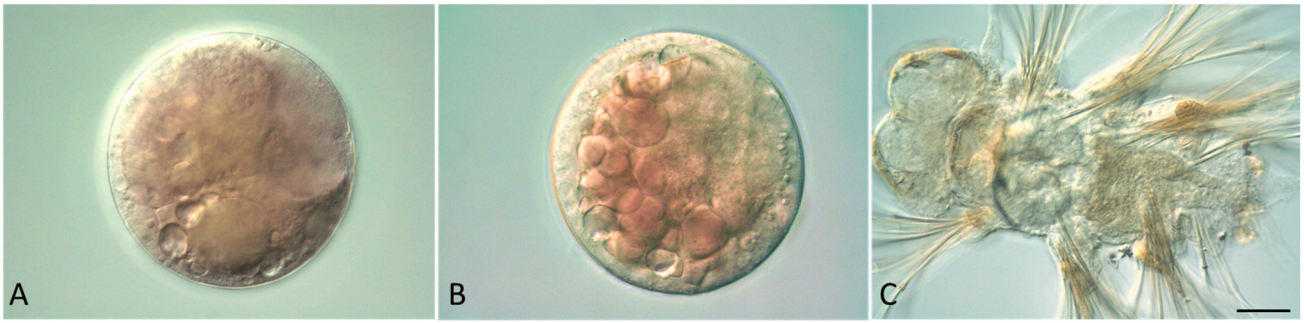

**Figure S1.** Results of in situ hybridization with the sense *Avi-nanos* DIG-labeled probe (negative control). **A**–Cleavage stage. **B**–Trochophore stage. **C**–4-segmented juvenile worm. Scale bar, 40 mkum for all panels.
